# Supplementary material
Source: PubMed Central journal article supplement (PMC6983840)
Supplement: supp_RA119.011853_157053_1_supp_443794_q2gddy.pdf [file supp_RA119.011853_157053_1_supp_443794_q2gddy.pdf]

The chloroplast metalloproteases VAR2 and EGY1 act synergistically to regulate chloroplast development in Arabidopsis

Yafei Qi (齐亚飞)<sup>1,\*</sup>, Xiaomin Wang (王晓敏)<sup>1,\*</sup>, Pei Lei (雷霖)<sup>1</sup>, Huimin Li (李慧敏)<sup>1</sup>, Liru Yan (闫丽如)<sup>1</sup>, Jun Zhao (赵军)<sup>1</sup>, Jingjing Meng (孟晶晶)<sup>1</sup>, Jingxia Shao (邵景侠)<sup>1</sup>, Lijun An (安丽君)<sup>1</sup>, Fei Yu (郁飞)<sup>1</sup>, Xiayan Liu (刘夏燕)<sup>1,#</sup>

From <sup>1</sup>State Key Laboratory of Crop Stress Biology for Arid Areas and College of Life Sciences, Northwest A&F University, Yangling, Shaanxi 712100, China

Running Title: *EGY1 regulates chloroplast development and proteostasis*

\* These authors contributed equally to this article

# To whom correspondence should be addressed: Xiayan Liu, College of Life Sciences, Northwest A&F University, 22 Xinong Road, Yangling, Shaanxi 712100, China; [xiayanliu@gmail.com](mailto:xiayanliu@gmail.com); Tel (Fax): +86-29-87091935.

---

**A list of the supplementary materials:**

**Figure S1.** *evr3-1* is a new allele of *egy1*.

**Figure S2.** The enhancement of *var2* by *egy1-2* and *egy1-3*.

**Figure S3.** PCR based genotyping to *evr3-1* and *F10-25* complement lines.

**Figure S4.** 2D BN/SDS-Urea-PAGE analysis of photosynthetic complexes in WT and *evr3-1*.

**Figure S5.** Abnormal accumulation of PSI and PSII complexes in three *egy1* mutants.

**Figure S6.** Accumulation of photosynthetic complexes in WT, *evr3-1*, *var2-4*, and *var2-5*.

**Figure S7.** 2D BN/SDS-Urea-PAGE analysis of photosynthetic complexes in WT, *evr3-1*, *var2-4*, and *var2-5*.

**Table S1.** Primers used in this study.

**Table S2.** Antibodies used in this study.

**Figure S1**

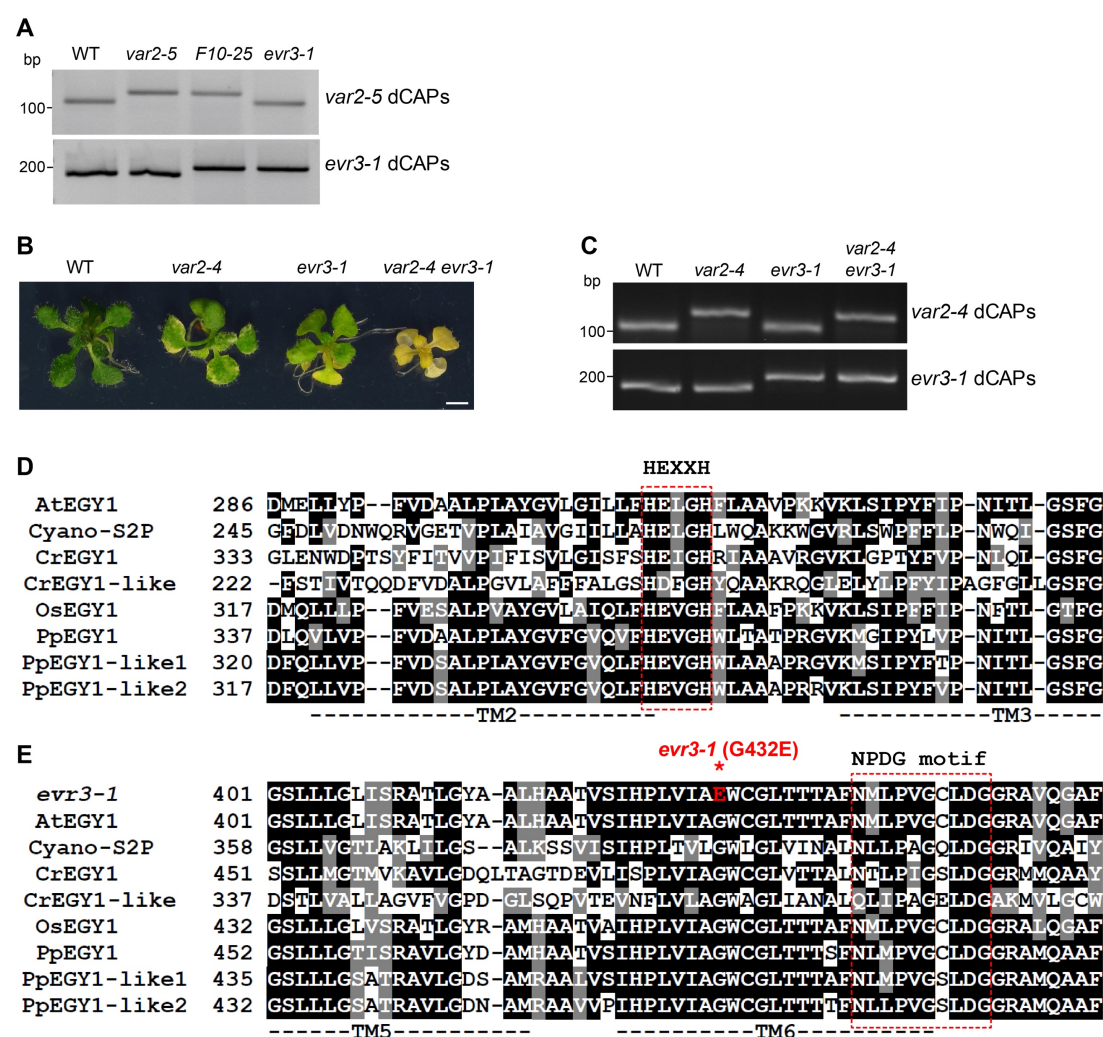

**Figure S1. *evr3-1* is a new allele of *egy1*.**

A. dCAPS genotyping of *VAR2* and *EVR3* loci for plants shown in Fig. 1A. B. Phenotypes of representative three-week-old WT, *var2-4*, *evr3-1* and *var2-4 evr3-1* grown on 1/2 MS medium supplemented with 1% sucrose. Bar, 5 mm. C. dCAPS genotyping of *VAR2* and *EVR3* loci for plants shown in B. D and E. Partial multiple sequence alignment of EGY1 and EGY1 homologues of representative photosynthetic species. Shown were the region containing the conserved zinc binding sites (HEXXD) (D) and the region containing the NPDG motif and the *evr3-1* mutation site (G432E) (E). Conserved motifs were framed with red boxes. Sequences of EGY1 homologues in *Synechocystis sp. PCC 6714* (Cyano-S2P, WP\_028947417.1), *Chlamydomonas reinhardtii* (CrEGY1, PNW86030.1; CrEGY1-like, PNW88890.1), *Oryza Sativa* (OsEGY1, XP\_015630593.1), and *Physcomitrella patens* (PpEGY1, XP\_024356580.1; PpEGY1-like1, XP\_024359606.1; PpEGY1-like2, XP\_024402167.1) were obtained from National Center for Biotechnology Information (NCBI).

**Figure S2**

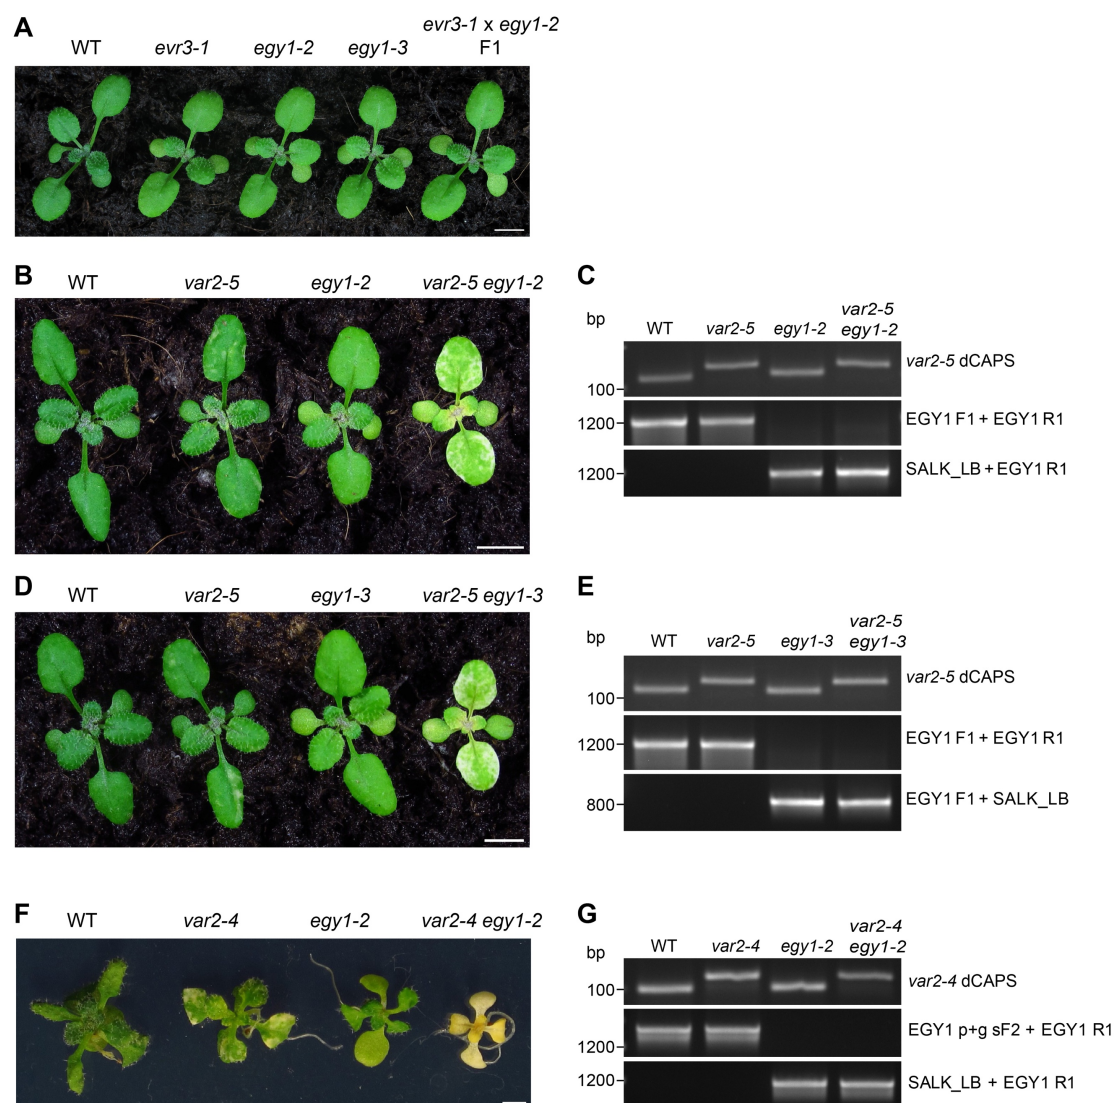

**Figure S2. The enhancement of *var2* by *egy1-2* and *egy1-3*.**

A. Phenotypes of representative two-week-old WT, *evr3-1*, *egy1-2*, *egy1-3*, and F1 of a cross between *evr3-1* and *egy1-2*. Bar, 5 mm. B. Phenotypes of representative two-week-old WT, *var2-5*, *egy1-2*, and *var2-5 egy1-2*. Bar, 5 mm. D. Phenotypes of representative two-week-old WT, *var2-5*, *egy1-3*, and *var2-5 egy1-3*. Bar, 5 mm. F. Phenotypes of representative three-week-old WT, *var2-4*, *egy1-2*, and *var2-4 egy1-2* grown on 1/2 MS medium supplemented with 1% sucrose. Bar, 5 mm. C, E, and G, PCR-based genotyping of plants shown in B, D, and F, respectively.

### Figure S3

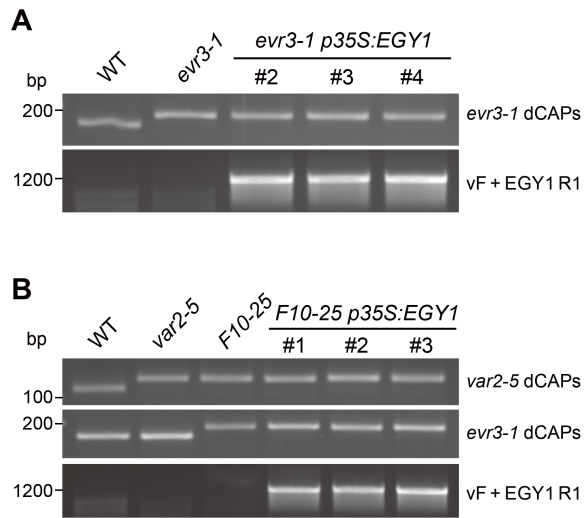

**Figure S3. PCR based genotyping of *evr3-1* and *F10-25* complementation lines.**

A. PCR-based genotyping of plants shown in Fig. 2C. B. PCR-based genotyping of plants shown in Fig. 2D.

**Figure S4**

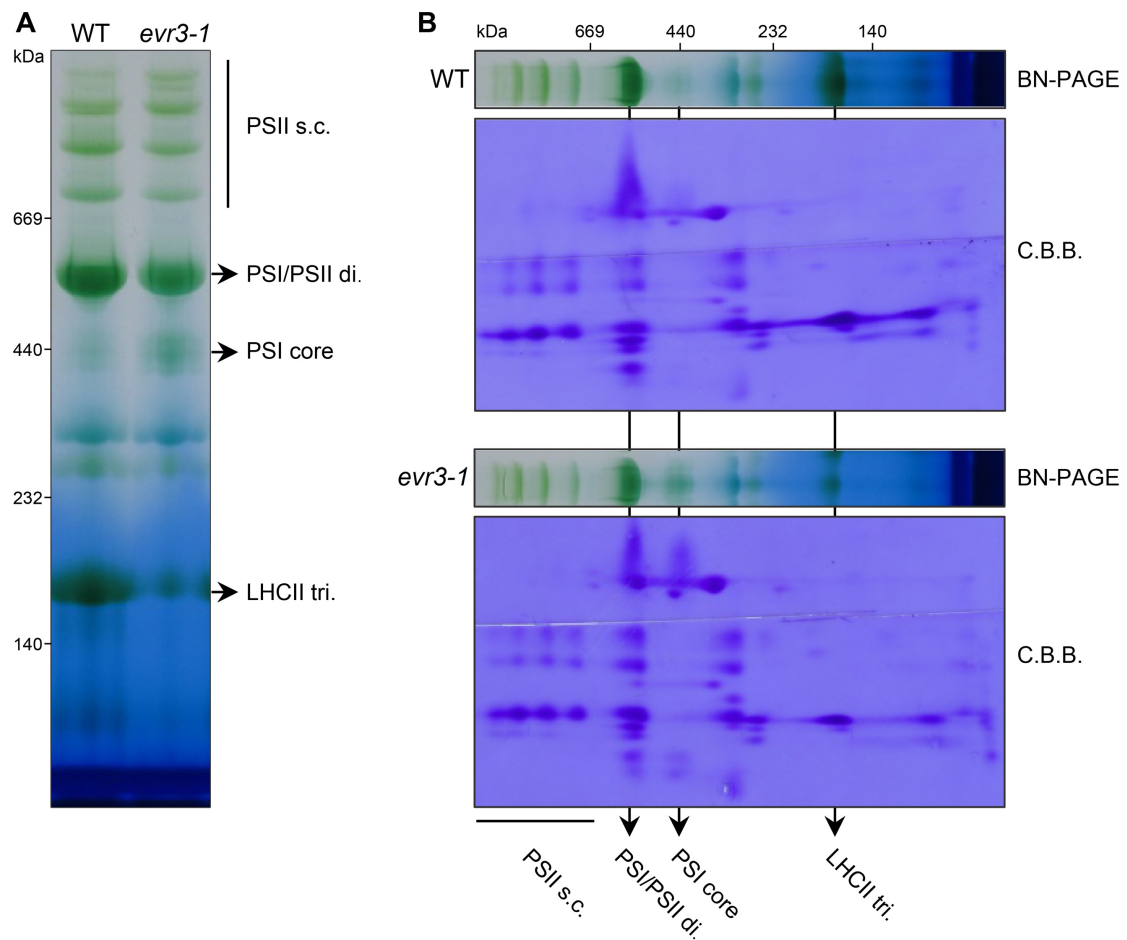

**Figure S4. 2-D BN/SDS-Urea-PAGE analysis of photosynthetic complexes in WT and *evr3-1*.** A. Thylakoid membranes from 4-week-old WT and *evr3-1* were solubilized with 1%  $\beta$ -dodecylmaltoside and resolved on 3%-12% BN-PAGE. B. 1-D BN-PAGE gel lanes shown in A were resolved on the 2-D SDS-PAGE and stained with Coomassie Brilliant Blue. Positions of PSII supercomplex (PSII s.c.), PSI/PSII dimer (PSI/PSII di.), PSI Core, and LHCII trimer (LHCII tri.) were marked.

**Figure S5**

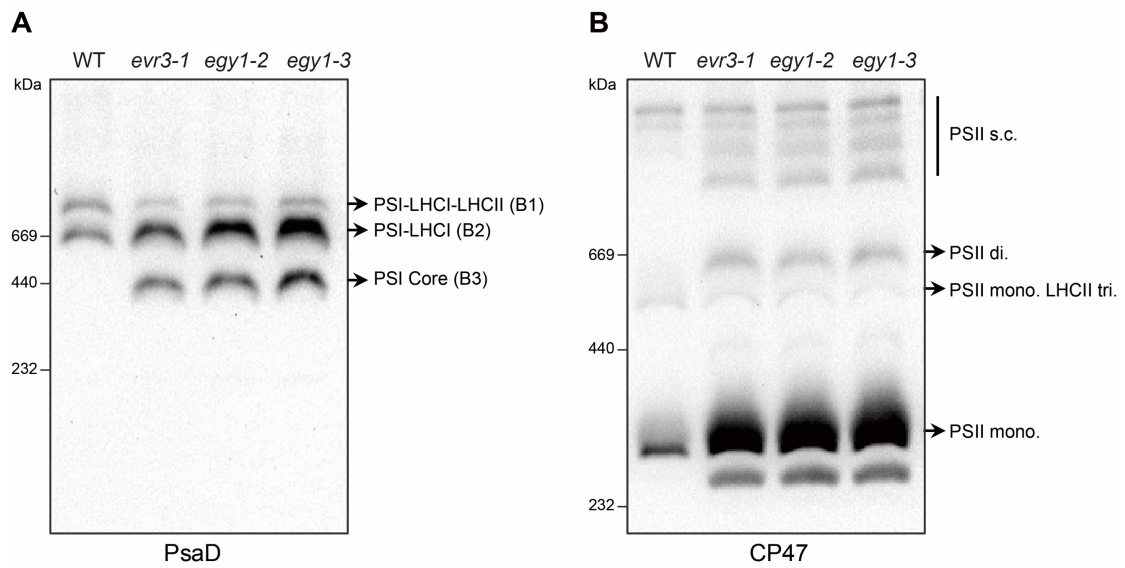

**Figure S5. Abnormal accumulations of PSI and PSII complexes in three *egy1* mutants.**

Thylakoid membranes from 4-week-old WT, *evr3-1*, *egy1-2* and *egy1-3*, were solubilized with 2% digitonin, resolved by 3%-12% BN-PAGE, and probed with antibodies against PsaD to show PSI complexes (A), and against PsbB (CP47) to show PSII complexes (B).

**Figure S6**

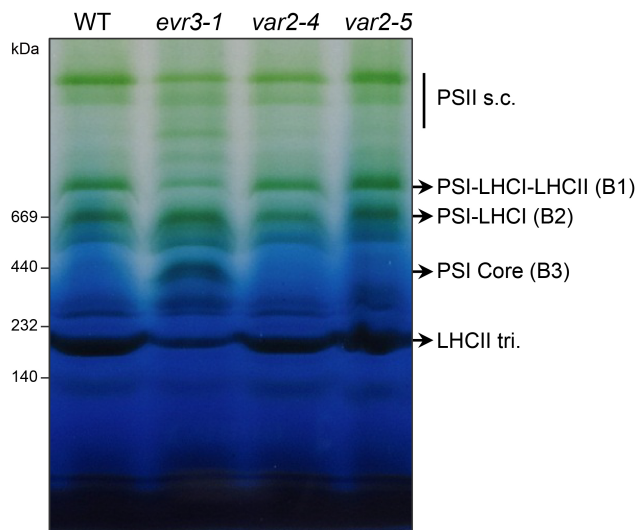

**Figure S6. Accumulation of photosynthetic complexes in WT, *evr3-1*, *var2-4*, and *var2-5*.**

Thylakoid membranes from 4-week-old plants were solubilized with 2% digitonin and resolved on 3%-12% BN-PAGE. Positions of PSII supercomplex (PSII s.c.), PSI-LHCI-LHCII (B1), PSI-LHCI (B2), PSI Core (B3), and LHCII trimer (LHCII tri.) were marked.



**Figure S7**

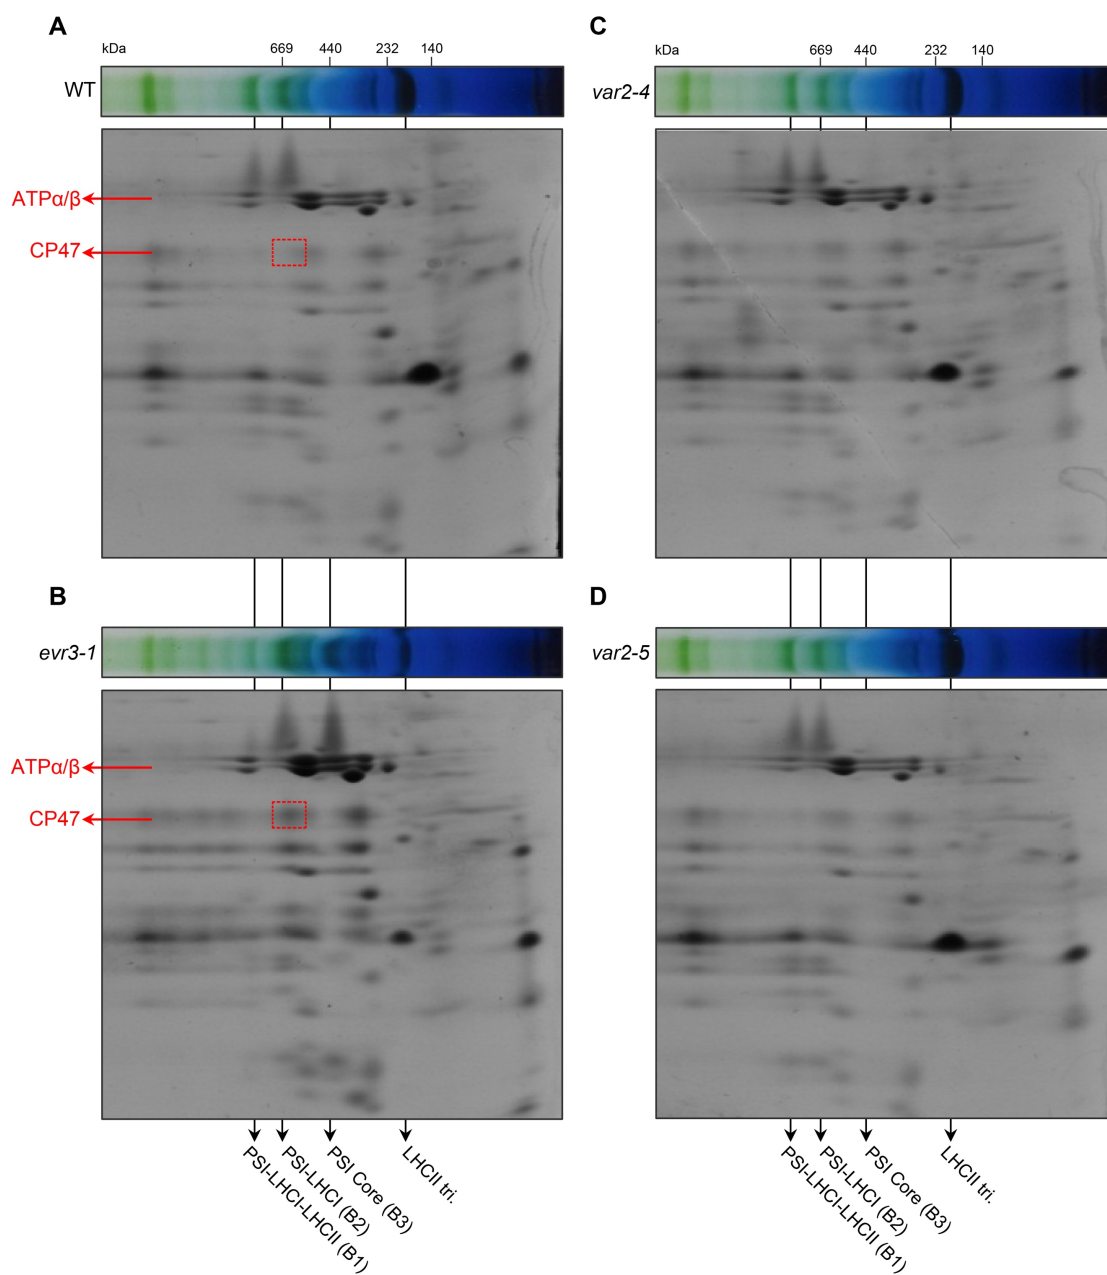

**Figure S7. 2-D BN/SDS-Urea-PAGE analysis of photosynthetic complexes in WT, *evr3-1*, *var2-4*, and *var2-5*.** Thylakoid membranes from 4-week-old WT (A), *evr3-1* (B), *var2-4* (C), and *var2-5* (D) were solubilized with 2% digitonin and resolved on 3%-12% BN-PAGE. BN-PAGE gel lanes were resolved on the 2-D SDS-PAGE and silver stained. Positions of PSI-LHCI-LHCII (B1), PSI-LHCI (B2), PSI Core (B3), and LHCII trimer (LHCII tri.) were marked. Red boxes indicated the positions of CP47 in PSII dimer. Note that the abundance of PSII dimer (represented by CP47) was different in WT and *evr3-1*.

**Table S1. Primers used in this study.**

| Primer name     | Primer sequences                             | Notes                                                               |
|-----------------|----------------------------------------------|---------------------------------------------------------------------|
| F10-25 F        | 5'-AATCCACCCACTTGTAATTCCTG-3'                | <i>evr3-1</i> dCAPS<br>(cut WT sequence w/ EcoRII)                  |
| F10-25 R        | 5'-ATACAAGGAAGTACCTGTACAGC-3'                |                                                                     |
| VAR2-4 F        | 5'-GGCCAGGACGGTTTGACCTGCA-3'                 | <i>var2-4</i> dCAPS<br>(cut WT sequence w/PstI)                     |
| VAR2-4 R        | 5'-TCAACACTTACCTGCACCAG-3'                   |                                                                     |
| VAR2-5 F        | 5'-CAAGAAAGCCAAGGAGAAGGATC-3'                | <i>var2-5</i> dCAPS<br>(cut WT sequence w/BamHI)                    |
| VAR2-5 R        | 5'-TCTCAGTTAGGAGCTGATTG-3'                   |                                                                     |
| EGY1 F1         | 5'-GTAACAGAGACGACAGTATC-3'                   | <i>egy1-2, egy1-3</i> genotyping                                    |
| EGY1 R1         | 5'-GCAAGAAAGTGCCCTAATTC-3'                   |                                                                     |
| EGY1<br>p+g sF2 | 5'-ACCAACATGACAGTCTGATC-3'                   |                                                                     |
| SALK_LB         | 5'-GAACAACACTCAACCCTATCTC-3'                 |                                                                     |
| VF              | 5'-CATGGATCCACTCTCGCTTTCTTCAT<br>CATCTC-3'   | genotyping <i>evr3-1</i> and <i>F10-25</i><br>complementation lines |
| AT5G35220 F     | 5'-CATGGATCCATGGGGACTCTCACCA<br>GCGTC-3'     | For <i>EGY1</i> cDNA cloning                                        |
| AT5G35220 R     | 5'-CATGGATCCTCAAAATGTGGTTACAA<br>GCCCTATG-3' |                                                                     |

**Table S2. Antibodies used in this study.**

| <b>Proteins</b> | <b>Antibodies ( Catalog Number)</b> |
|-----------------|-------------------------------------|
| PsbA            | Agrisera (AS05 084)                 |
| PsbB            | PhytoAB (PHY0058A)                  |
| PsbC            | PhytoAB (PHY0059A)                  |
| PsbD            | PhytoAB (PHY0060)                   |
| PsaA            | PhytoAB (PHY0342)                   |
| PsaC            | PhytoAB (PHY0055A)                  |
| PsaD            | PhytoAB (PHY0343)                   |
| PsaF            | Kindly provided by Dr. Aigen Fu     |
| Cytf            | Kindly provided by Dr. Aigen Fu     |
| PetC            | Agrisera (AS08 330)                 |
| LhcA1           | PhytoAB (PHY0043S)                  |
| LhcA2           | PhytoAB (PHY0082S)                  |
| LhcB2           | Agrisera (AS01 003)                 |
| VAR2/FtsH2      | Qi et al., 2016                     |
